# Supplementary material for: Methylene Blue in Septic Shock: A Systematic Review and Meta-Analysis
Source: PubMed Central journal article supplement — Crit Care Explor. 2024 Jun 21;6(7):e1110. doi: 10.1097/CCE.0000000000001110 (PMC11196076; doi:10.1097/cce.0000000000001110), 2024-06-21

## Methylene Blue in Septic Shock – Supplement

### *Methylene Blue in Septic Shock – A Systematic Review and Meta-Analysis*

Shannon M. Fernando, MD, MSc; Alexandre Tran, MD, MSc; Karim Soliman, MD;  
Barbara Flynn, BScRN; Thomas Oommen, PharmD; Li Wenzhe, MD; Neill K. J.  
Adhikari, MDCM, MSc; Salmaan Kanji, PharmD; Andrew J. E. Seely, MD, PhD; Alison  
E. Fox-Robichaud, MD, MSc; Randy S. Wax, MD, MEd; Deborah J. Cook, MD, MSc;  
François Lamontagne, MD, MSc; Bram Rochweg MD, MSc

**ELECTRONIC APPENDIX**

**Supplemental Figure 1:** Search Strategy ..... 3

**Supplemental Table 1:** Standardized Data Extraction Sheet..... 4

**Supplemental Table 2:** Characteristics of the 6 randomized trials. .... 6

**Supplemental Table 3:** Quality Assessment for Risk of Bias of the 6 studies ..... 7

**Supplemental Figure 2:** Forest plots depicting efficacy and safety of methylene blue versus placebo or usual care. .... 8

**Supplemental Table 4:** GRADE Evidence Profile..... 10

**Supplemental Figure 3:** Sensitivity Analyses – Forest Plots..... 12

**Supplemental Figure 1:** Search Strategy

MEDLINE Search

1. Exp Methylene blue/
2. Methylene blue.mp. [mp=title, abstract, original title, name of substance word, subject heading word, floating sub-heading word, keyword heading word, organism supplementary concept word, protocol supplementary concept word, rare disease supplementary concept word, unique identifier, synonyms]
3. 1 or 2
4. Sepsis or septic.mp. [mp=title, abstract, original title, name of substance word, subject heading word, floating sub-heading word, keyword heading word, organism supplementary concept word, protocol supplementary concept word, rare disease supplementary concept word, unique identifier, synonyms]
5. Multiple organ failure/
6. Critical illness/
7. Respiratory distress syndrome/
8. ((severe or serious or critical or intensive) adj3 (illness or infection\* or shock or care)).mp. [mp=title, abstract, original title, name of substance word, subject heading word, floating sub-heading word, keyword heading word, organism supplementary concept word, protocol supplementary concept word, rare disease supplementary concept word, unique identifier, synonyms]
9. Organ adj3 failure.mp. [mp=title, abstract, original title, name of substance word, subject heading word, floating sub-heading word, keyword heading word, organism supplementary concept word, protocol supplementary concept word, rare disease supplementary concept word, unique identifier, synonyms]
10. 4 or 5 or 6 or 7 or 8 or 9
11. 3 and 10

**Supplemental Table 1:** Standardized Data Extraction Sheet.

| Data to be Extracted                                                                                                   | Notes to Reviewer          |
|------------------------------------------------------------------------------------------------------------------------|----------------------------|
| <b>Basic Study Information</b>                                                                                         |                            |
| Study Title                                                                                                            |                            |
| Journal                                                                                                                |                            |
| Year of Publication                                                                                                    |                            |
| Language                                                                                                               |                            |
| Author                                                                                                                 | List first author only     |
| Correspondence Email                                                                                                   |                            |
| Study Design                                                                                                           |                            |
| Number of Sites                                                                                                        |                            |
| Country/Countries of Study                                                                                             |                            |
| <b>Eligibility Assessment</b>                                                                                          |                            |
| Does the study include adult patients (i.e. $\geq 16$ years of age)?                                                   | If “No” – Exclude          |
| Does the study enroll or present a subgroup of patients with sepsis or septic shock?                                   | If “No” – Exclude          |
| Definition of “Sepsis/Septic Shock” (e.g., Sepsis-3 criteria; SIRS criteria, etc.).                                    |                            |
| Does the study evaluate the use of intravenous methylene blue (at any dose, duration of therapy, and with any timing)? | If “No” – Exclude          |
| Does the study compare patients receiving methylene blue with those not receiving MB, or those administered placebo?   | If “No” – Exclude          |
| <b>Trial Characteristics</b>                                                                                           |                            |
| Was population was included?                                                                                           | E.g. mixed, surgical, etc. |
| What was the mean duration of hospitalization?                                                                         |                            |
| Were elderly patients included?                                                                                        |                            |
| Were pregnant patients included?                                                                                       |                            |
| Were patients with any other co-morbidity included/excluded?                                                           |                            |
| Methylene Blue Dosing                                                                                                  |                            |
| Control (if applicable)                                                                                                |                            |
| <b>Risk of Bias Assessment</b>                                                                                         |                            |
| How were patients randomized?                                                                                          |                            |
| In either the intervention or the control group, were there any deviations from the protocol?                          |                            |
| Was there any missing outcome data?                                                                                    |                            |
| Were the outcome measures objective?                                                                                   |                            |

Methylene Blue in Septic Shock – Supplement

|                                                      |                                                             |
|------------------------------------------------------|-------------------------------------------------------------|
| Were all important pre-specified outcomes presented? |                                                             |
| Any other bias noted?                                |                                                             |
| <b>Outcome #1</b>                                    |                                                             |
| Outcome being evaluated                              | e.g. Short-term mortality                                   |
| Dichotomous or continuous outcome?                   |                                                             |
| Methylene Blue: N analyzed                           |                                                             |
| Methylene Blue: Number of Events/Mean                |                                                             |
| Control: N analyzed                                  |                                                             |
| Control: Number of Events/Mean                       |                                                             |
| Comments                                             |                                                             |
| <b>Outcome #2</b>                                    |                                                             |
| Outcome being evaluated                              | e.g. Duration of vasopressors                               |
| Dichotomous or continuous outcome?                   |                                                             |
| Methylene Blue: N analyzed                           |                                                             |
| Methylene Blue: Number of Events/Mean                |                                                             |
| Control: N analyzed                                  |                                                             |
| Control: Number of Events/Mean                       |                                                             |
| Comments                                             |                                                             |
| <b>Author Contact</b>                                |                                                             |
| Contact author?                                      | If more information needed, indicate here to contact author |

## Methylene Blue in Septic Shock – Supplement

**Supplemental Table 2:** Characteristics of the 6 randomized trials. *Abbreviations:* MB = methylene blue; SIRS = systemic inflammatory response syndrome; SSRI = selective serotonin reuptake inhibitor

| First Author, Year   | Journal                       | Sites | Country | Population                             | Inclusion Criteria                                                                                                                                                        | Exclusion Criteria                                                                                                                                                                                                                                                                 | Dose of Methylene Blue                                                                                          | Timing of Methylene Blue Administration         | Total Sample Size | Mean Age (Years) | % Male | % Mortality (Short-term) |
|----------------------|-------------------------------|-------|---------|----------------------------------------|---------------------------------------------------------------------------------------------------------------------------------------------------------------------------|------------------------------------------------------------------------------------------------------------------------------------------------------------------------------------------------------------------------------------------------------------------------------------|-----------------------------------------------------------------------------------------------------------------|-------------------------------------------------|-------------------|------------------|--------|--------------------------|
| Ibarra-Estrada, 2023 | <i>Crit Care</i>              | 1     | Mexico  | Intensive Care Unit                    | Age $\geq$ 18 years, with septic shock (Sepsis-3 criteria)                                                                                                                | >24h of norepinephrine infusion; Pregnancy; High probability of death; Concurrent hemorrhage; Obstructive or hypovolemic shock; Pending surgery; Major burn injury; Personal or family history of G6PD deficiency; Allergy to MB, phenothiazides, or food dyes; Recent SSRI intake | Intravenous infusion of 100mg MB in 500mL of 0.9% normal saline over 6 hours daily; 3 days total                | Within 24 hours of initiation of norepinephrine | 92                | 46.5             | 60.9   | 39.6                     |
| Kirov, 2001          | <i>Crit Care Med</i>          | 1     | Norway  | Intensive Care Unit                    | Age $\geq$ 18 years, with septic shock ( $\geq$ 2 SIRS criteria and a mean arterial pressure of <70mmHg at 30 mins despite fluid resuscitation or receiving vasopressors) | Pregnancy; Receiving corticosteroids; Immunosuppressants; Chemotherapy; Known irreversible underlying disease (such as end-stage neoplasms)                                                                                                                                        | Intravenous bolus of 2mg/kg for 15 mins) followed by infusion of escalating doses of 0.25-2 mg/kg/hr for 1 each | Within 2 hours of randomization                 | 20                | 57.4             | 55     | 40.0                     |
| Li, 2021             | <i>Diet Health</i>            | 1     | China   | Intensive Care Unit                    | Septic shock (Unclear definition)                                                                                                                                         | Abnormal liver and kidney function; Patients with incomplete data                                                                                                                                                                                                                  | Intravenous bolus of 2mg/kg for 15 mins                                                                         | Unclear                                         | 66                | 52.7             | 59.1   | 22.7                     |
| Lu, 2019             | <i>Nat Med J China</i>        | 1     | China   | Intensive Care Unit                    | Age $\geq$ 18 years, with septic shock (Sepsis-3 criteria)                                                                                                                | History of previous myocardial infarction or stroke in the preceding 3 months; Pregnancy; Known anaphylaxis to MB; Nitrate use in previous 3 days                                                                                                                                  | Intravenous bolus of 2mg/kg with or without 2mg/kg infusion over 24 hours                                       | Unclear                                         | 54                | 64               | 53.7   | 18.5                     |
| Memis, 2002          | <i>Anaesth Intensive Care</i> | 1     | Turkey  | Operating Room and Intensive Care Unit | Age $\geq$ 18 years, with septic shock ( $\geq$ 2 SIRS criteria and a mean arterial pressure of <70mmHg at 30 mins despite fluid resuscitation or receiving vasopressors) | Pregnancy; Receiving corticosteroids; Immunosuppressants; Chemotherapy; Known irreversible underlying disease (such as end-stage neoplasms)                                                                                                                                        | Intravenous infusion of 0.5 mg/kg/hr over 6 hours                                                               | Unclear                                         | 30                | 52.4             | 60     | 26.7                     |
| Xiong, 2010          | <i>China J Anesthesiol</i>    | 1     | China   | Operating Room and Intensive Care Unit | Septic shock (Unclear definition) undergoing emergency surgery                                                                                                            | Abnormal liver or kidney function; Previous methemoglobinemia; Previous carbon monoxide or cyanide poisoning                                                                                                                                                                       | Intravenous infusion of 0.5-1.0 mg/kg/hr during surgery                                                         | Intraoperative                                  | 40                | 47.5             | 52.5   | Not Recorded             |

Methylene Blue in Septic Shock – Supplement

**Supplemental Table 3:** Quality Assessment for Risk of Bias of the 6 studies. N.B. “Yes” = low risk of bias.

| Author, Year         | Allocation Sequencing? | Allocation Concealment? | Blinding?          | Infrequent Loss to Follow-up? | Free of Selective Outcome Reporting? | No Other Risk of Bias? | Overall Risk of Bias |
|----------------------|------------------------|-------------------------|--------------------|-------------------------------|--------------------------------------|------------------------|----------------------|
| Ibarra-Estrada, 2023 | Probably Yes           | Definitely Yes          | Probably Yes       | Definitely Yes                | Definitely Yes                       | Definitely Yes         | Low                  |
| Kirov, 2001          | Definitely Yes         | Definitely Yes          | <i>Probably No</i> | Definitely Yes                | Probably Yes                         | Probably Yes           | High                 |
| Li, 2021             | <i>Definitely No</i>   | <i>Definitely No</i>    | <i>Probably No</i> | Definitely Yes                | Probably Yes                         | Probably Yes           | High                 |
| Lu, 2019             | <i>Probably No</i>     | <i>Probably No</i>      | <i>Probably No</i> | Definitely Yes                | Probably Yes                         | Probably Yes           | High                 |
| Memis, 2002          | Probably Yes           | Definitely Yes          | Probably Yes       | Definitely Yes                | Probably Yes                         | Probably Yes           | Low                  |
| Xiong, 2010          | Probably Yes           | Probably Yes            | <i>Probably No</i> | Definitely Yes                | Probably Yes                         | Probably Yes           | High                 |

**Supplemental Figure 2:** Forest plots depicting efficacy and safety of methylene blue versus placebo or usual care.

**Short-term Mortality**

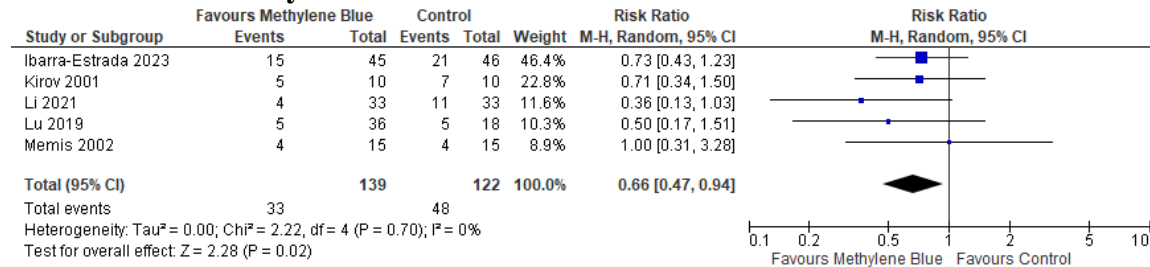

**Mean Arterial Pressure at 6 Hours (mmHg)**

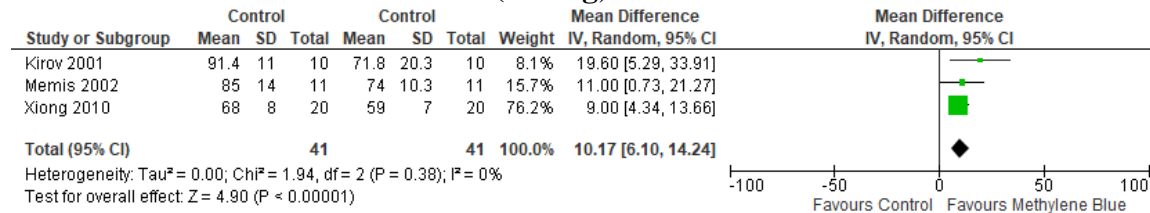

**Duration of Vasopressors (Hours)**

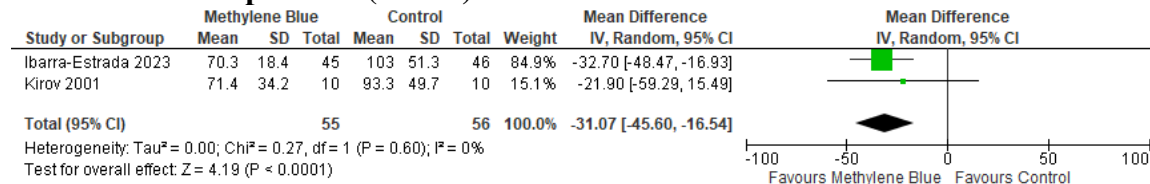



# Methylene Blue in Septic Shock – Supplement

## Duration of Invasive Mechanical Ventilation (Days)

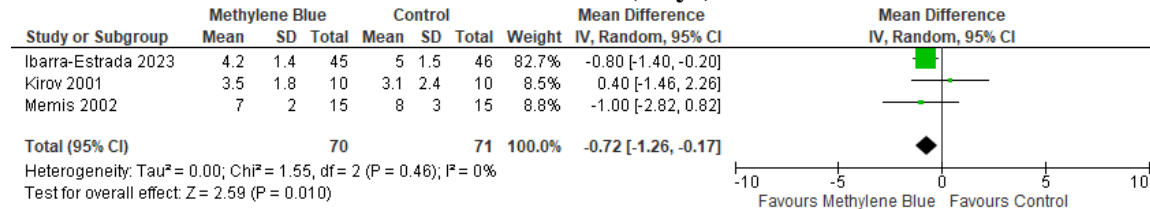

## Intensive Care Unit Length of Stay (Days)

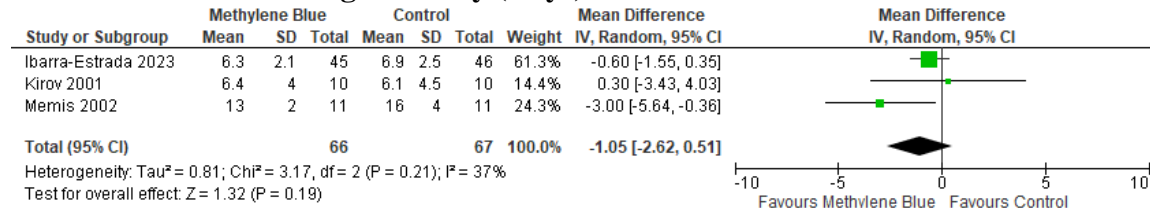

## Hospital Length of Stay (Days)

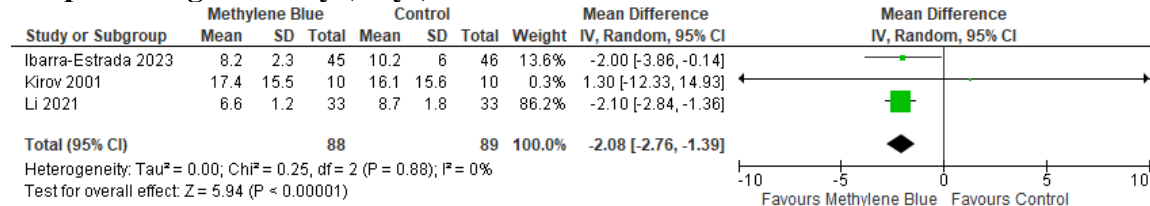

## Methemoglobin Concentration (%)

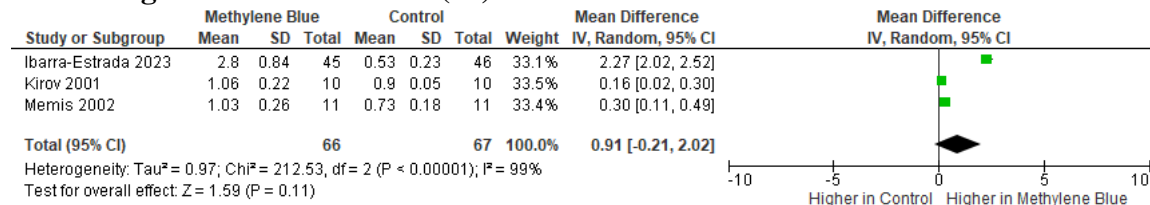

# Methylene Blue in Septic Shock – Supplement

**Supplemental Table 4: GRADE Evidence Profile.**

Author(s):

Question: Methylene blue compared to usual care for distributive shock

Setting:

Bibliography:

| Certainty assessment                                 |                   |                      |               |              |                      |                      | № of patients  |                | Effect                    |                                                      | Certainty   | Narrative                                             |
|------------------------------------------------------|-------------------|----------------------|---------------|--------------|----------------------|----------------------|----------------|----------------|---------------------------|------------------------------------------------------|-------------|-------------------------------------------------------|
| № of studies                                         | Study design      | Risk of bias         | Inconsistency | Indirectness | Imprecision          | Other considerations | methylene blue | usual care     | Relative (95% CI)         | Absolute (95% CI)                                    |             |                                                       |
| <b>Mortality</b>                                     |                   |                      |               |              |                      |                      |                |                |                           |                                                      |             |                                                       |
| 5                                                    | randomised trials | serious <sup>a</sup> | not serious   | not serious  | serious <sup>b</sup> | none                 | 33/139 (23.7%) | 48/122 (39.3%) | RR 0.66<br>(0.47 to 0.94) | 134 fewer per 1,000<br>(from 209 fewer to 24 fewer)  | ⊕⊕○○<br>Low | Methylene blue may decrease mortality.                |
| <b>MAP at 6 hours (assessed with: mmHg)</b>          |                   |                      |               |              |                      |                      |                |                |                           |                                                      |             |                                                       |
| 3                                                    | randomised trials | serious <sup>a</sup> | not serious   | not serious  | serious <sup>b</sup> | none                 | 41             | 41             | -                         | MD 10.17 mmHg higher<br>(6.1 higher to 14.24 higher) | ⊕⊕○○<br>Low | Methylene blue may increase MAP at 6 hours.           |
| <b>ICU Length of Stay (assessed with: days)</b>      |                   |                      |               |              |                      |                      |                |                |                           |                                                      |             |                                                       |
| 3                                                    | randomised trials | serious <sup>a</sup> | not serious   | not serious  | serious <sup>d</sup> | none                 | 66             | 67             | -                         | MD 1.05 days fewer<br>(2.62 fewer to 0.51 more)      | ⊕⊕○○<br>Low | Methylene blue may reduce ICU length of stay.         |
| <b>Hospital Length of Stay (assessed with: days)</b> |                   |                      |               |              |                      |                      |                |                |                           |                                                      |             |                                                       |
| 3                                                    | randomised trials | serious <sup>a</sup> | not serious   | not serious  | serious <sup>b</sup> | none                 | 88             | 89             | -                         | MD 2.08 days fewer<br>(1.39 fewer to 2.76 fewer)     | ⊕⊕○○<br>Low | Methylene blue may decrease hospital length of stay.  |
| <b>Duration of IMV (assessed with: days)</b>         |                   |                      |               |              |                      |                      |                |                |                           |                                                      |             |                                                       |
| 3                                                    | randomised trials | serious <sup>a</sup> | not serious   | not serious  | serious <sup>a</sup> | none                 | 70             | 71             | -                         | MD 0.72 days fewer<br>(1.26 fewer to 0.17 fewer)     | ⊕⊕○○<br>Low | Methylene blue may have no effect on duration of IMV. |

# Methylene Blue in Septic Shock – Supplement

| Certainty assessment                                    |                   |                      |                      |              |                      |                      | № of patients  |            | Effect            |                                                       | Certainty        | Narrative                                                       |
|---------------------------------------------------------|-------------------|----------------------|----------------------|--------------|----------------------|----------------------|----------------|------------|-------------------|-------------------------------------------------------|------------------|-----------------------------------------------------------------|
| № of studies                                            | Study design      | Risk of bias         | Inconsistency        | Indirectness | Imprecision          | Other considerations | methylene blue | usual care | Relative (95% CI) | Absolute (95% CI)                                     |                  |                                                                 |
| <b>Duration of vasopressors (assessed with: days)</b>   |                   |                      |                      |              |                      |                      |                |            |                   |                                                       |                  |                                                                 |
| 2                                                       | randomised trials | serious <sup>a</sup> | not serious          | not serious  | serious <sup>b</sup> | none                 | 55             | 56         | -                 | MD 31.07 hours fewer (16.54 fewer to 45.6 fewer)      | ⊕⊕○○<br>Low      | Methylene blue may decrease the duration of vasopressors.       |
| <b>MetHgb Concentration (assessed with: percentage)</b> |                   |                      |                      |              |                      |                      |                |            |                   |                                                       |                  |                                                                 |
| 3                                                       | randomised trials | serious <sup>a</sup> | serious <sup>c</sup> | not serious  | serious <sup>d</sup> | none                 | 66             | 67         | -                 | MD 0.91 percentage higher (0.21 lower to 2.02 higher) | ⊕○○○<br>Very low | Methylene blue has an uncertain effect on MetHgb concentration. |

CI: confidence interval; MD: mean difference; RR: risk ratio

## Explanations

- a. Majority of evidence comes from studies at high risk of bias
- b. small number of patients and events contributes to imprecision
- c. Visual inspection of the forest plot suggests important variability amongst included studies
- d. Wide confidence intervals that don't exclude harm or benefit
- e. Small numbers, and confidence interval doesn't exclude benefit

**Supplemental Figure 3: Sensitivity Analyses – Forest Plots.**

**Excluding “High Risk of Bias” Studies**

**Short-term Mortality**

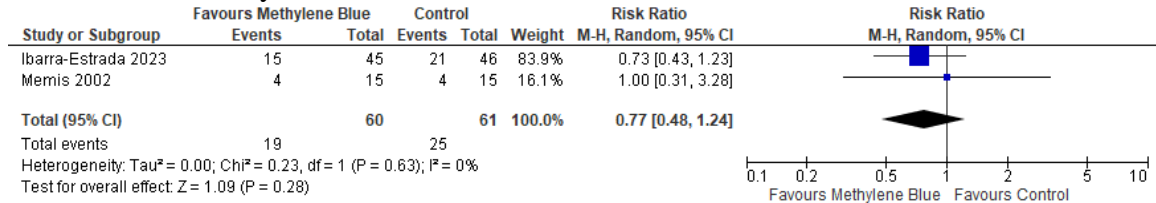

**Mean Arterial Pressure at 6 hours (mmHg)**

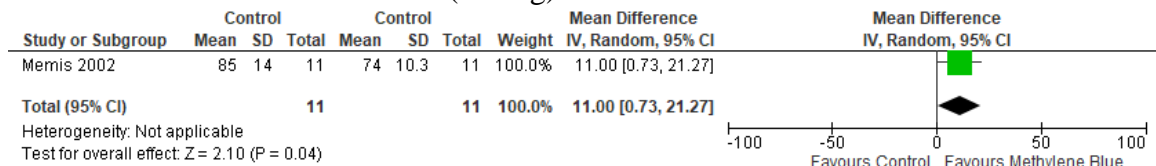

**Intensive Care Unit Length of Stay (Days)**

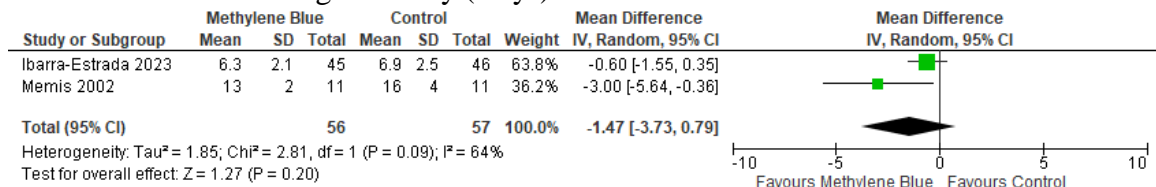

**Hospital Length of Stay (Days)**

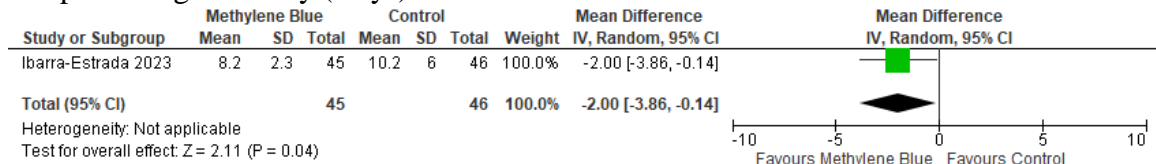

**Duration of Invasive Mechanical Ventilation (Days)**

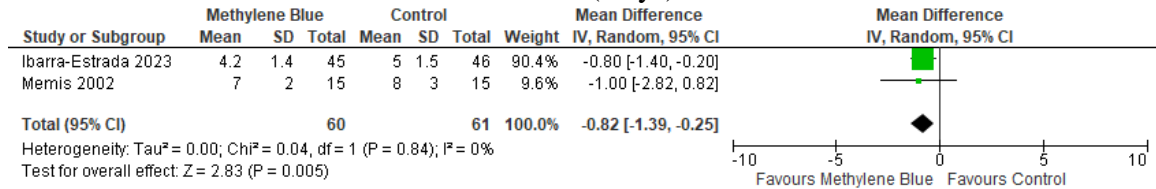

**Duration of Vasopressors (Hours)**

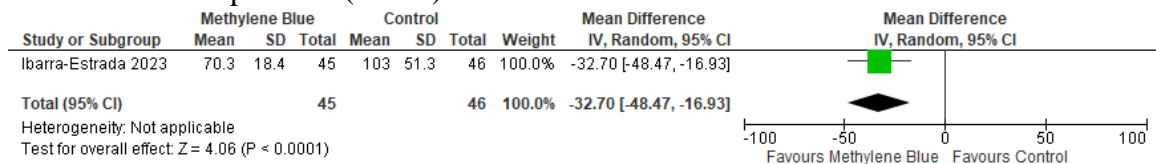

# Methylene Blue in Septic Shock – Supplement

## Excluding Studies with MB Bolus Only (i.e. without infusion)

### Short-term Mortality

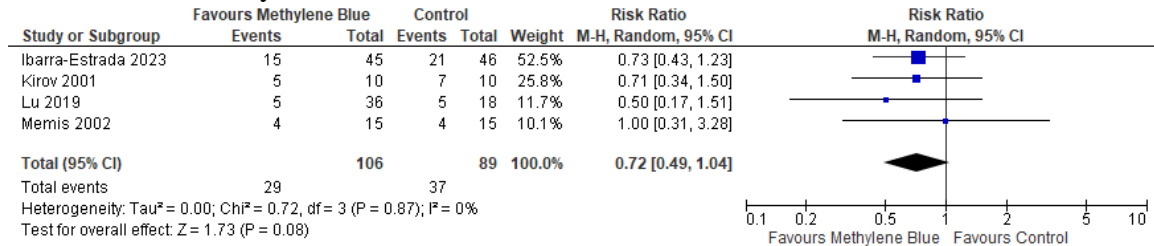

### Mean Arterial Pressure (6 Hours)

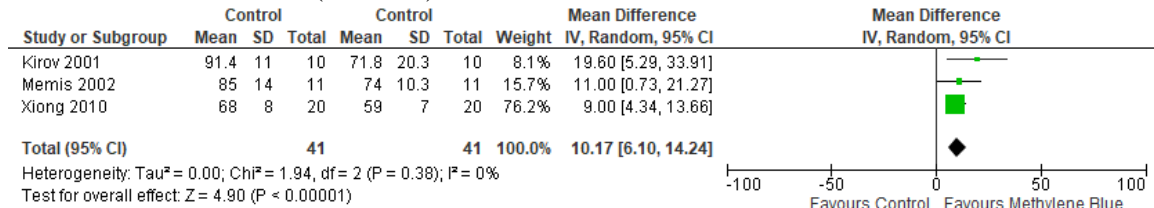

### Intensive Care Unit Length of Stay (Days)

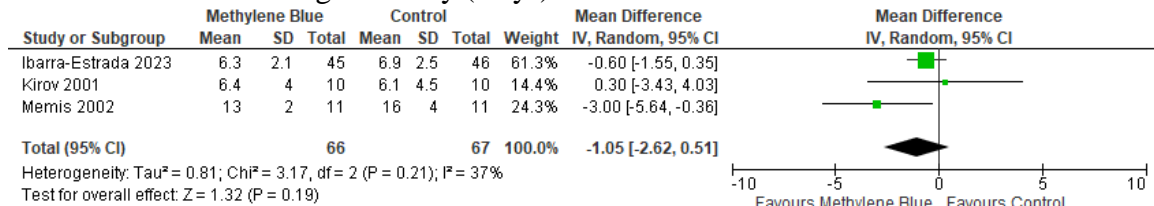

### Hospital Length of Stay (Days)

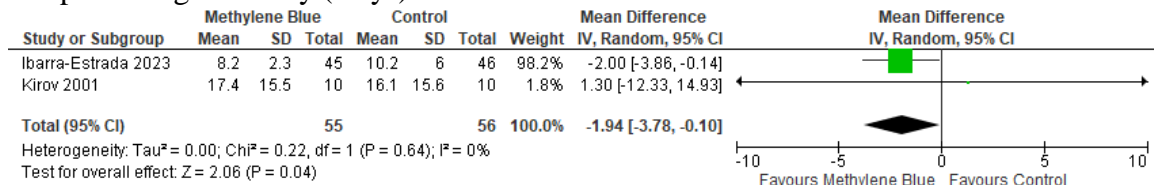

### Duration of Invasive Mechanical Ventilation (Days)

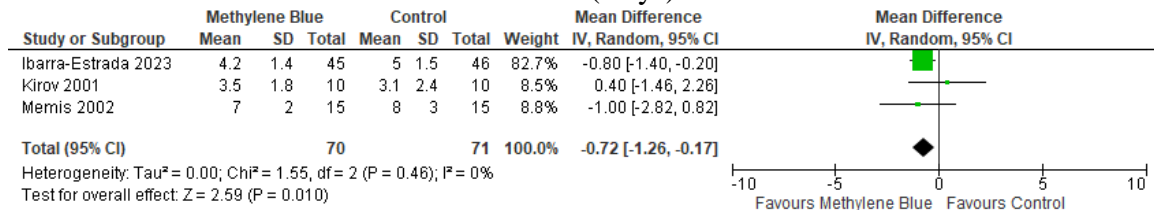

# Methylene Blue in Septic Shock – Supplement

## Duration of Vasopressors (Hours)

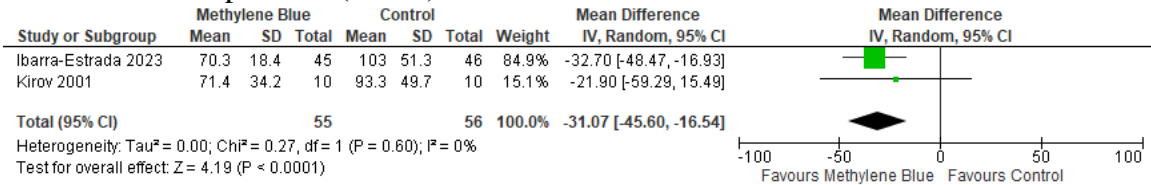

## Methemoglobin Concentration (%)

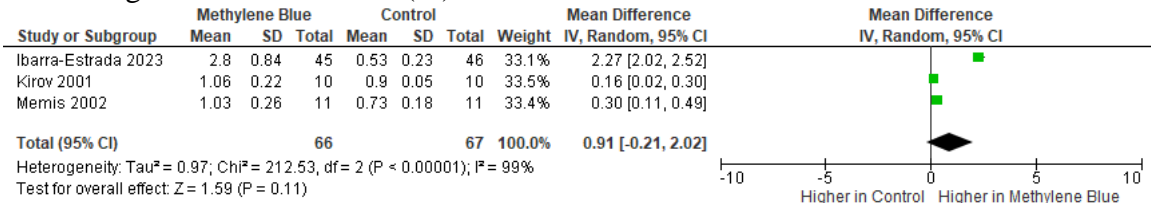

Supplement: cc9-6-e1110-s001.pdf [file cc9-6-e1110-s001.pdf]
